# Supplementary material
Source: HighWire-hosted journal article supplement (http://jpet.aspetjournals.org/highwire/filestream/152743/field_highwire_adjunct_files/1/1493_supp_data_2.pdf)
Supplement: 1493_supp_data_2.pdf [file 1493_supp_data_2.pdf]

**Supplementary Information for:**

Title: Metformin Monotherapy Alters the Human Plasma Lipidome Independent of Clinical Markers of Glycemic Control and Cardiovascular Disease Risk in a Type 2 Diabetes Clinical Cohort

Authors: Benjamin Wancewicz, Yanlong Zhu, Rachel J. Fenske, Alicia M. Weeks, Kent Wenger, Samantha Pabich, Michael Daniels, Margaret Punt, Randall Nall, Darby C. Peter, Allan Brasier, Elizabeth D. Cox, Dawn Belt Davis, Ying Ge, and Michelle E. Kimple

Journal: Journal of Pharmacology and Experimental Therapeutics

Manuscript Number: JPET-AR-2022-001493R1

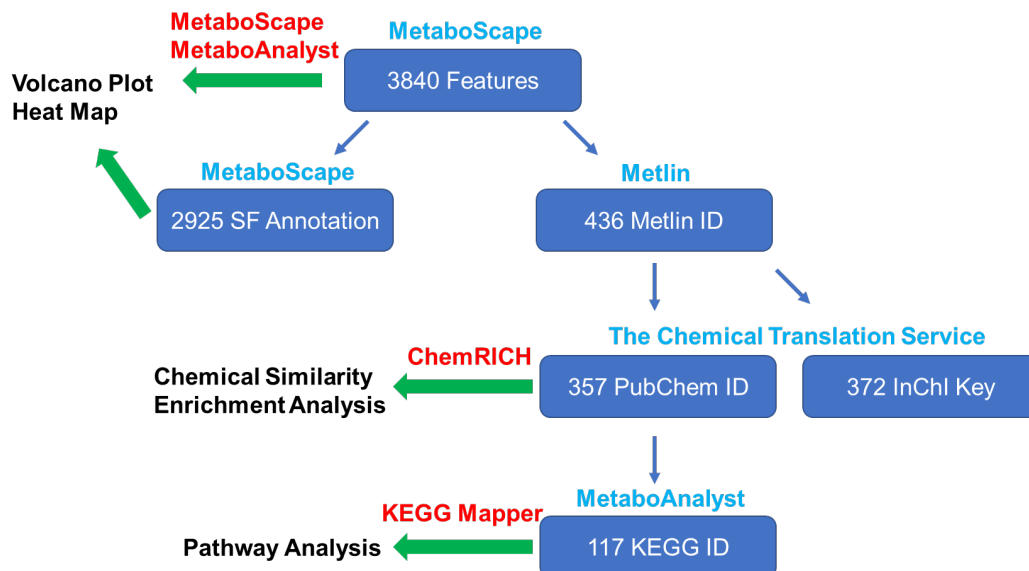

**Figure S1:** Overview of annotation workflow. Features were identified in MetaboScape. MetaboScape was used to annotate features by chemical formulas, and Metlin was used to annotate features by chemical name. The Chemical Translation Service was used to obtain chemical identifiers, PubChem ids, InChI keys, and KEGG ids of Metlin-annotated features. These chemical identifiers were used for MetaboAnalyst and ChemRich analyses.

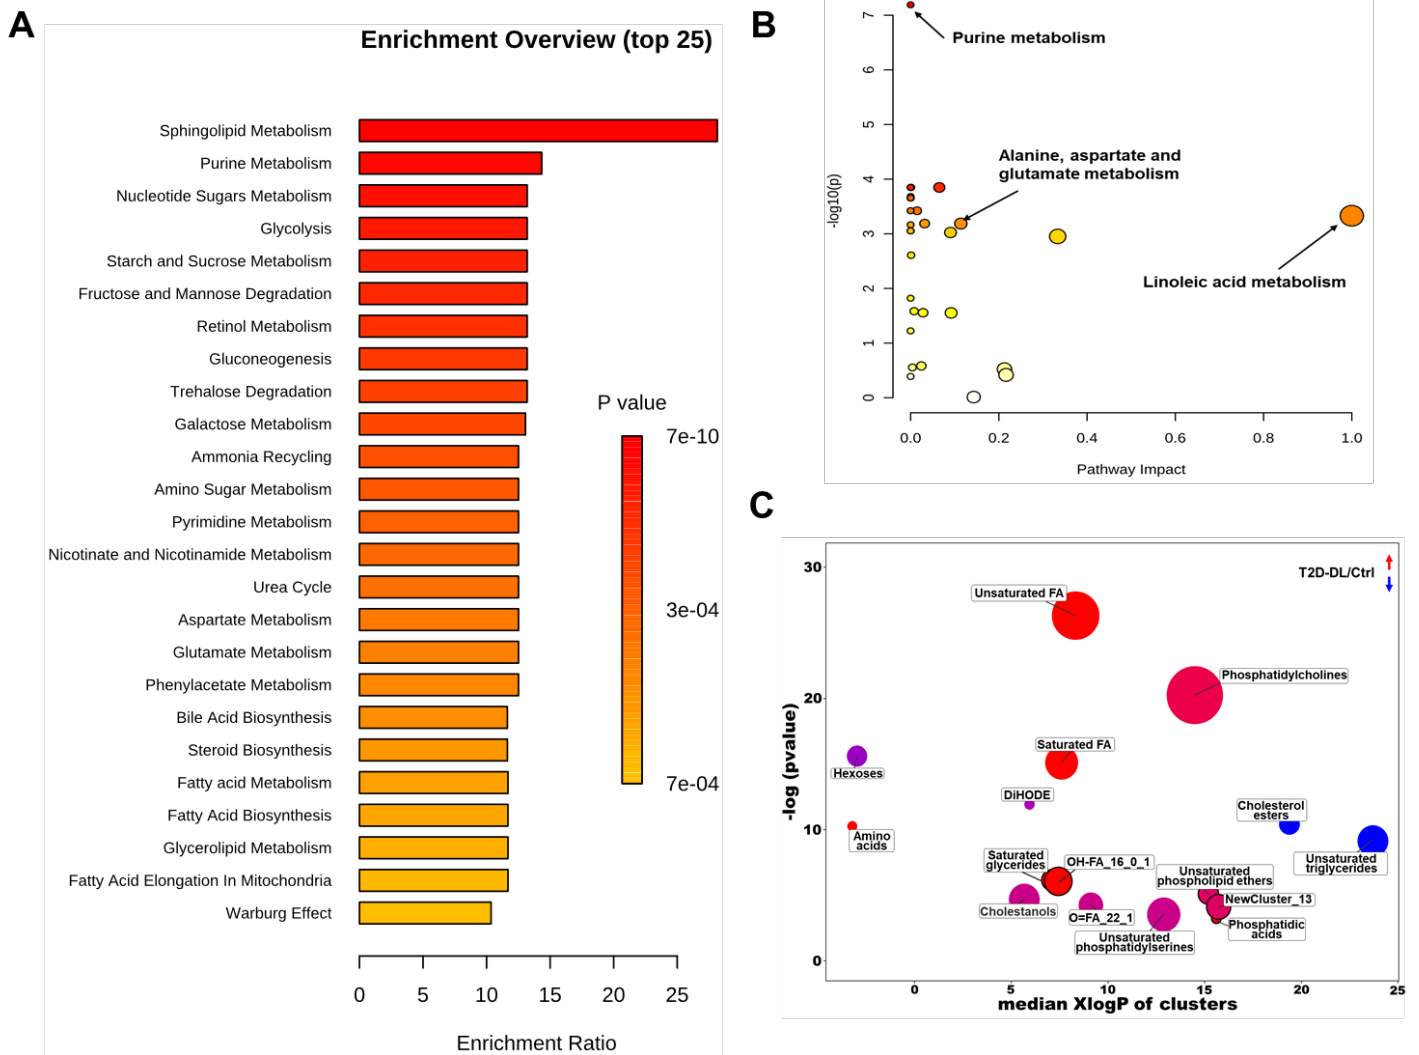

**Figure S2.** Metabolic differences between diet/lifestyle (T2D-DL) and control groups. **A.** Enrichment analysis of metformin group compared to control. **B.** Pathway analysis of the two groups with a gradient from red (smaller p-value) to yellow (larger p-value). **C.** ChemRich analysis with size of circle correlating to number of statistically significant features (p-value < 0.05) that are altered. Red is upregulated in the diet/lifestyle group, blue downregulated and purple contains upregulated and downregulated metabolites.

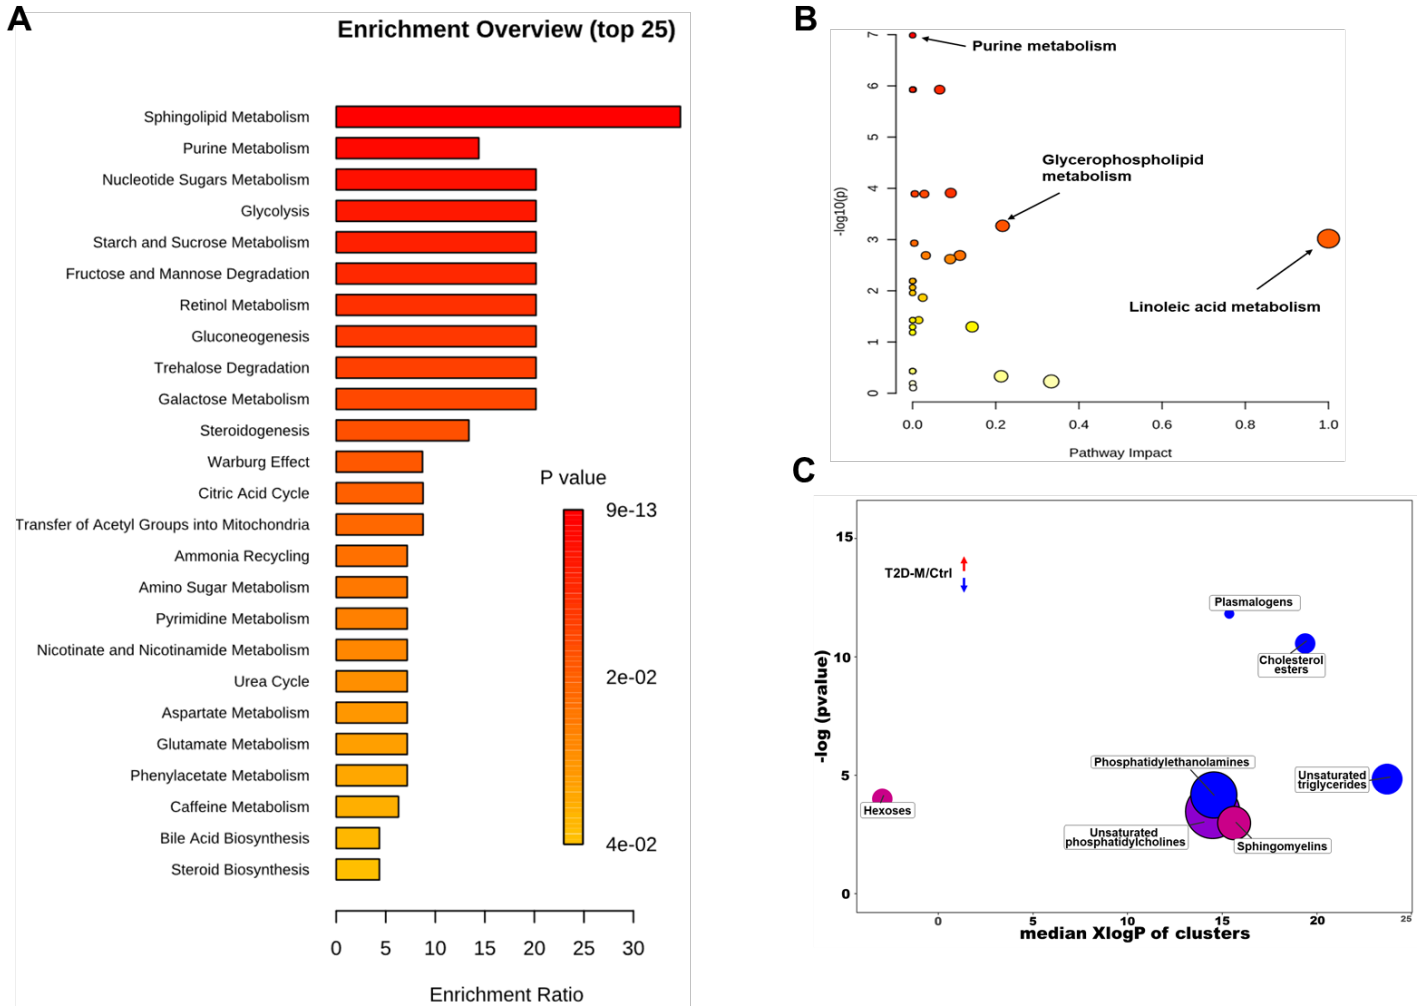

**Figure S3.** Metabolic differences between metformin (T2D-M) and control groups. **A.** Enrichment analysis of metformin group compared to control. **B.** Pathway analysis of the two groups with a gradient from red (smaller p-value) to yellow (larger p-value). **C.** ChemRich analysis with size of circle correlating to number of statistically significant features (p-value < 0.05) that are altered. Red is upregulated in the metformin group, blue downregulated and purple contains upregulated and downregulated metabolites.

**Table S1.** Significantly altered metabolites between T2D-DL (Diet and Lifestyle) and nondiabetic.

| Class/Pathway and Metabolites                                                                   | InChI Key                    | p(FDR) | Ratio (T2D-DL/ND) |
|-------------------------------------------------------------------------------------------------|------------------------------|--------|-------------------|
| <b>Amino acids, peptides, and analogues</b>                                                     |                              |        |                   |
| Distichonic acid A                                                                              | SEATYFZPTMHEIW-UHFFFAOYSA-N  | 0.0324 | 1.78              |
| Glutamine                                                                                       | ZDXPYRJPNDTMRX-VKHMYHEASA-N  | 0.0022 | 1.26              |
| Valine                                                                                          | KZSNJWFQEVHDMF-BYPYZUCNSA-N  | 0.0057 | 2.12              |
| <b>Anthracenes</b>                                                                              |                              |        |                   |
| Palmidin C                                                                                      | VUUFXTUVVIEIMH-UHFFFAOYSA-N  | 0.0025 | 1.24              |
| <b>Bile acids, alcohols and derivatives</b>                                                     |                              |        |                   |
| 27-Nor-5b-cholestane-3a,7a,12a,24,25-pentol                                                     | UBCPEZWGUOSYHO-JAPSQKQGSA-N  | 0.0390 | 1.81              |
| Castasterone                                                                                    | VYUIKSIFYFRVQLF-YLNAYWRASA-N | 0.0241 | 0.65              |
| Nutriacholic acid                                                                               | DXOCDBGWDZAYRQ-QPVZPPSOSA-N  | 0.0077 | 1.96              |
| 6 $\alpha$ -Hydroxycastasterone                                                                 | CVXIEYXJQSRIAC-KLUYZAHOSA-N  | 0.0399 | 0.70              |
| <b>Carbohydrates and carbohydrate conjugates</b>                                                |                              |        |                   |
| $\alpha$ -L-Fucopyranosyl-(1 $\rightarrow$ 2)-b-D-galactopyranosyl-(1 $\rightarrow$ 2)-D-xylose | DPTWUYFOEZBIEX-UHFFFAOYSA-N  | 0.0045 | 0.76              |
| Dulcitol                                                                                        | FBPfZTCfMRRESA-GUCUJZIISA-N  | 0.0025 | 2.95              |
| Fucose                                                                                          | SHZGCJCMOBCMKK-FPRJBGLDSA-N  | 0.0011 | 0.62              |
| Glucoheptonic acid                                                                              | FATUQANACHZLRT-KMRXSBRUSA-L  | 0.0060 | 1.19              |
| Glucose                                                                                         | WQZGKKKJIJFFOK-DVKNGEFBSA-N  | 0.0018 | 1.19              |
| <b>Cholestane steroids</b>                                                                      |                              |        |                   |
| Cholesterol sulfate                                                                             | BHYOQNUELFTYRT-DPAQBDIFSA-N  | 0.0124 | 0.25              |
| <b>Diradylglycerols</b>                                                                         |                              |        |                   |
| DG (29:1)                                                                                       | XRIOEAXABJXXOB-CCZSOTCQSA-N  | 0.0399 | 1.63              |
| <b>Diterpenoids</b>                                                                             |                              |        |                   |
| Phytenic acid                                                                                   | WDWBNNBRPVVEOD-PFXVRADUSA-N  | 0.0000 | 1.74              |
| <b>Estrane steroids</b>                                                                         |                              |        |                   |
| 3,5-Tetrahydronorethindrone                                                                     | DPDZKJQFRFZZCW-VIVHBNLFSA-N  | 0.0077 | 2.98              |
| <b>Fatty acid esters</b>                                                                        |                              |        |                   |
| Octanoylcarnitine                                                                               | CXTATJFJDMJMIY-CYBMUJFWSA-N  | 0.0399 | 2.20              |
| Palmitoylcarnitine                                                                              | XOMRRQXKHMVMOC-OAQYLSRUSA-N  | 0.0014 | 1.64              |
| Sorbitan palmitate                                                                              | IYFATESGLOUGBX-RERQMSIWSA-N  | 0.0135 | 1.29              |
| <b>Fatty acids and conjugates</b>                                                               |                              |        |                   |
| 10,13-nonadecadienoic acid                                                                      | FLYBGKXSHCVONZ-HZJYTTRNSA-N  | 0.0008 | 3.21              |
| 11,14-Eicosadienoic acid                                                                        | XSXIVVZCUAHUJO-AVQMFFATSA-N  | 0.0304 | 1.36              |
| 15-hydroxy-pentacosanoic acid                                                                   | JIUVLHYELZYWJO-UHFFFAOYSA-N  | 0.0414 | 2.22              |
| 17-methyl-6-octadecenoic acid                                                                   | QWCJNFBSZGETP-CLFYSBASSA-N   | 0.0044 | 1.59              |
| 2,3-dihydroxy stearic acid                                                                      | UAZFXPRZXKJSFJ-UHFFFAOYSA-N  | 0.0101 | 1.36              |
| 2-heptadecylenic acid                                                                           | GEHPRJRWZDWFBFJ-FOCLMDBBSA-N | 0.0045 | 1.49              |
| 2-methoxy-hexadecanoic acid                                                                     | YNBIUHDYZWCBSF-UHFFFAOYSA-N  | 0.0063 | 2.50              |
| 4,7,10,13,16,19-Docosahexaenoic acid                                                            | MBMBGCFOFBJS�T-SFGLVEFQSA-N  | 0.0221 | 1.55              |
| 8,11-eicosadienoic acid                                                                         | AJBBHZDIKZCZAI-UHFFFAOYSA-N  | 0.0045 | 1.44              |

| Adrenic Acid                                  | TWSWSIQAPQLDBP-DOFZRALJSA-N  | 0.0082   | 1.49              |
|-----------------------------------------------|------------------------------|----------|-------------------|
| Class/Pathway and Metabolites                 | InChI Key                    | p(FDR)   | Ratio (T2D-DL/ND) |
| <b>Fatty acids and conjugates (continued)</b> |                              |          |                   |
| Clupanodonic acid                             | YUFFSWGQGVEMMI-JLNKQSITSA-N  | 0.0064   | 1.60              |
| Eicosanedioic acid                            | JJOJFIHJIRWASH-UHFFFAOYSA-N  | 0.0003   | 1.81              |
| Eicosatrienoic acid                           | HOBALERKJCKHQD-QNEBEIHSSA-N  | 0.0194   | 1.44              |
| Hexadecenoic acid                             | ZVRMGCSSSYZGSM-CCEZHUSRSA-N  | 0.0124   | 1.69              |
| Lauric acid                                   | POULHZVOKOAJMA-UHFFFAOYSA-N  | 0.0021   | 2.38              |
| Margaric acid                                 | KEMQGTRYUADPNZ-UHFFFAOYSA-N  | 0.0025   | 1.33              |
| Myristic acid                                 | TUNFSRHWOTWDNC-UHFFFAOYSA-N  | 0.0201   | 1.36              |
| Myristoleic acid                              | YWWWXASSLXJHU-WAYWQWQTSAN    | 0.0017   | 1.92              |
| OAHA                                          | OCHJVQODRYVDAA-YPKPFQOOSA-N  | 0.0020   | 1.61              |
| Oleic Acid                                    | ZQPPMHVWECSIRJ-KTKRTIGZSA-N  | 0.0003   | 1.63              |
| PAHA                                          | XXHBLSWAKHZVLN-UHFFFAOYSA-N  | 0.0204   | 1.38              |
| Palmitic acid                                 | IPCSVZSSVZVIGE-UHFFFAOYSA-N  | 0.0033   | 1.42              |
| Pentadecylic acid                             | WQEPLUUGTLDZJY-UHFFFAOYSA-N  | 0.0259   | 1.31              |
| POHA                                          | VCXRHEIVUHPWLL-SEYXRHQNSA-N  | 0.0433   | 1.36              |
| Ricinoleic acid                               | WBHHMMIMDMUBKC-QJWNTBNXSA-N  | 0.0045   | 1.59              |
| SAHA                                          | NQJLCZWOVLQNP-UHFFFAOYSA-N   | 0.0009   | 1.54              |
| Stearic acid                                  | QIQXTHQIDYTRFH-UHFFFAOYSA-N  | 0.0006   | 1.40              |
| <b>Fatty acyl glycosides</b>                  |                              |          |                   |
| Melibiitol                                    | PYZZILDSAJNLZ-QZNPSCGDSA-N   | 0.0201   | 0.67              |
| <b>Fatty alcohols</b>                         |                              |          |                   |
| Artemoin A                                    | KKUONIIRIFHWJC-UHFFFAOYSA-N  | 0.0115   | 1.77              |
| Momordol                                      | HDAGCVMZABHLHLE-UHFFFAOYSA-N | 0.0011   | 2.53              |
| <b>Glycerophosphates</b>                      |                              |          |                   |
| PA (44:5)                                     | CAEQPKFDJRNAGN-BMJUURGTSA-N  | 0.0003   | 3.28              |
| PA (30:1)                                     | IUGHITQXXGJGCD-AHVPQQLLSA-N  | 0.0390   | 1.59              |
| <b>Glycerophosphocholines</b>                 |                              |          |                   |
| Glycerophosphocholine                         | SUHOQUVVVLNYQR-MRVPVSSYSA-N  | 0.0054   | 2.46              |
| PC (22:6)                                     | LSOWKZULVQWMLY-APPDJCNMSA-N  | 0.0237   | 3.03              |
| PC (34:1)                                     | WTJKGGKOPKCXLL-VYOBOKEXSA-N  | 0.0000   | 0.14              |
| PC (34:4)                                     | PWFGSGJBCRORHV-DVHMRFIGSA-N  | 0.0000   | 0.22              |
| PC (36:4)                                     | IIZPXYDJKNOIY-JXPKJXOSSA-N   | 0.0173   | 1.25              |
| PC (36:5)                                     | KLTHQSWIRFFBRI-CPFPVJFHSA-N  | 0.0047   | 1.63              |
| PC (38:6)                                     | IESVDEZGAHUQJU-ZLBXKVHBSA-N  | 0.0011   | 1.40              |
| PC (o-14:0)                                   | WNCMKZYTBLIUSK-JOCHJYFZSA-N  | 0.0353   | 0.75              |
| PC (o-34:3)                                   | QEWXRREALGMKRGPMZWPLUPDSA-N  | 0.0399   | 1.63              |
| PC (o-36:4)                                   | DUUSFCFZBREELS-SEHARXJXSA-N  | 0.0274   | 0.41              |
| PC (o-38:4)                                   | IRWRFKUTKSUFST-MDYGELLQSA-N  | 0.0477   | 1.96              |
| PC (o-38:5)                                   | VJNPDLZENXBRLB-MQEDXBOASA-N  | 0.0000   | 3.61              |
| PC (o-38:6)                                   | QQQQNYAHSSIZBU-HIQXTUQZSA-N  | 0.0054   | 2.15              |
| <b>Glycerophosphoethanolamines</b>            |                              |          |                   |
| PE (36:2)                                     | CFANDHZPOSNKNO-UDHSZFGOSA-N  | 2.87e-10 | 5.52              |

| Class/Pathway and Metabolites                     | InChI Key                    | p(FDR) | Ratio (T2D-DL/ND) |
|---------------------------------------------------|------------------------------|--------|-------------------|
| PE (44:3)                                         | NTIXPPFPXLYJCT-SWXWTCIYSA-N  | 0.0481 | 1.96              |
| <b>Glycerophosphoethanolamines (continued)</b>    |                              |        |                   |
| PE (p-36:2)                                       | BIYXBOGKCFGRKR-NZWMGPRYSA-N  | 0.0290 | 0.33              |
| PE (p-38:1)                                       | UAPYZCDNFGJZSC-QSKLCZHJSA-N  | 0.0425 | 1.67              |
| <b>Glycerophosphoserines</b>                      |                              |        |                   |
| PS (22:1)                                         | UVRWNZBXLMSZFS-IEACRGRWSA-N  | 0.0257 | 0.76              |
| PS (o-35:0)                                       | CRNHCTGXIEELY-RGULYWUFUSA-N  | 0.0355 | 2.35              |
| PS (o-38:0)                                       | ALHYOYYGOVGUJA-ZFESHMOZSA-N  | 0.0083 | 2.32              |
| <b>Hydroxycinnamic acids and derivatives</b>      |                              |        |                   |
| Erythrinasinatate A                               | XEOWPOLWKNHXGL-NHQQMKOOSA-N  | 0.0165 | 1.55              |
| <b>Hydroxyindoles</b>                             |                              |        |                   |
| Indoxyl                                           | PCKPVGOLPKLUHR-UHFFFAOYSA-N  | 0.0292 | 1.25              |
| <b>Indoles</b>                                    |                              |        |                   |
| Indole-3-ethanol                                  | MBBOMCVGYCRMEA-UHFFFAOYSA-N  | 0.0116 | 0.74              |
| <b>Lineolic acids and derivatives</b>             |                              |        |                   |
| 9-hydroperoxy-10,12-octadecadienoic acid          | JGUNZIWGNMQSBM-UINYOVNOSA-N  | 0.0006 | 3.02              |
| Dimorphecolic acid (9-HODE)                       | NPDSHTNEKLQQIJ-SIGMCMEVSA-N  | 0.0036 | 0.63              |
| Linoleic acid                                     | OYHQOLUKZRVURQ-HZJYTRNSA-N   | 0.0022 | 1.48              |
| Linolenic acid                                    | DTOSIQBPPRVQHS-PDBXOOCHSA-N  | 0.0068 | 1.48              |
| $\alpha$ -kamlolenic acid                         | YPHQMIRXEFDOQM-ALXQIFAGSA-N  | 0.0186 | 0.62              |
| <b>Medium-chain hydroxy acids and derivatives</b> |                              |        |                   |
| 3-Hydroxydodecanoic acid                          | MUCMKTPAZLSKTL-UHFFFAOYSA-N  | 0.0042 | 0.60              |
| <b>Monoradylglycerols</b>                         |                              |        |                   |
| MG (14:0)                                         | TVIMZSOUQXNWHO-UHFFFAOYSA-N  | 0.0022 | 1.48              |
| MG (16:0)                                         | QHZLMUACJMDIAE-SFHVURJKSA-N  | 0.0001 | 1.51              |
| MG (16:1)                                         | CXUXMSACCLYMBI-FPLPWBNSA-N   | 0.0000 | 1.75              |
| <b>Naphthofurans</b>                              |                              |        |                   |
| Cafamarine                                        | TXMUQQBIIGAMBQ-UHFFFAOYSA-N  | 0.0257 | 0.31              |
| <b>Phosphosphingolipids</b>                       |                              |        |                   |
| SM (d32:1)                                        | KYICBZWZQPCUMO-PSALXKTOSA-N  | 0.0328 | 2.13              |
| SM (d34:1)                                        | RWKUXQNLWDTLSLO-GWQJGLRPSA-N | 0.0000 | 1.36              |
| SM (d36:1)                                        | LKQLRGMMMAHREN-YJFYUILSA-N   | 0.0000 | 0.25              |
| SM (d36:2)                                        | NBEADXWAAWCCDG-QDDWGVBSA-N   | 0.0000 | 1.47              |
| <b>Pregnane steroids</b>                          |                              |        |                   |
| Allopregnanolone                                  | AURFZBICLPNKBZ-SYBPFIFISA-N  | 0.0022 | 2.43              |
| <b>Purine ribonucleotides</b>                     |                              |        |                   |
| Inosine diphosphate                               | JPXZQMKKFWMGK-KQYNXXCUSA-N   | 0.0000 | 1.98              |
| <b>Steroid esters</b>                             |                              |        |                   |
| Cholesteryl linoleate                             | NAACPBBQTFYQB-LJAITQKLSA-N   | 0.0007 | 0.16              |
| CE (20:4)                                         | IMXSFYNMSOULQS-BEDFLICRSA-N  | 0.0026 | 0.21              |
| <b>Stilbenes</b>                                  |                              |        |                   |
| Dihydroresveratrol                                | HITJFUSPLYBJPE-UHFFFAOYSA-N  | 0.0022 | 2.54              |

| Class/Pathway and Metabolites                          | InChI Key                   | p(FDR) | Ratio (T2D-DL/ND) |
|--------------------------------------------------------|-----------------------------|--------|-------------------|
| <b>Sulfones</b>                                        |                             |        |                   |
| 2-Propenyl 3-(2-propenylsulfonyl)-1-propenyl disulfide | OBJCYMGLWKMJIK-ALCCZGGFSA-N | 0.0031 | 2.31              |
| <b>Terpene glycosides</b>                              |                             |        |                   |
| Goshonoside F6                                         | NUDLZKKCTSSWNM-MHWRWJLKSA-N | 0.0460 | 1.86              |
| <b>Tricarboxylic acids and derivatives</b>             |                             |        |                   |
| Citric acid                                            | KRKNYBCHXYNGOX-UHFFFAOYSA-N | 0.0110 | 1.44              |
| <b>Triacylglycerols</b>                                |                             |        |                   |
| TG (52:2)                                              | BHPBNQOWGMVFMA-QGJNQHKMSA-N | 0.0489 | 0.24              |
| TG (52:3)                                              | JOSCSCZRVHLRGE-CQBMRIABSA-N | 0.0086 | 0.31              |



**Table S2.** Significantly altered metabolites between T2D-M (metformin-treated group) and nondiabetic.

| Class/Pathway and Metabolites                    | InChI Key                   | p(FDR) | Ratio (T2D-M/ND) |
|--------------------------------------------------|-----------------------------|--------|------------------|
| <b>Amines</b>                                    |                             |        |                  |
| Arachidoyl Ethanolamide                          | AUJVQJHODMISJP-UHFFFAOYSA-N | 0.0066 | 0.41             |
| <b>Amino acids, peptides, and analogues</b>      |                             |        |                  |
| Glutamine                                        | ZDXPYRJPNDTMRX-VKHMYHEASA-N | 0.0339 | 1.16             |
| His Asp                                          | MDCTVRUPVLZSPG-BQBZGAKWSA-N | 0.0153 | 1.95             |
| <b>Anthracenes</b>                               |                             |        |                  |
| Palmidin C                                       | VUUFXTUVVIEIMH-UHFFFAOYSA-N | 0.0046 | 1.25             |
| <b>Bile acids, alcohols and derivatives</b>      |                             |        |                  |
| 27-Nor-5b-cholestane-3a,7a,12a,24,25-pentol      | UBCPEZWGUOSYHO-JAPSQKQGSAN  | 0.0026 | 2.24             |
| Nutriacholic acid                                | DXOCDBGWDZAYRQ-QPVZPPSOSAN  | 0.0054 | 2.10             |
| <b>Carbohydrates and carbohydrate conjugates</b> |                             |        |                  |
| Fucose                                           | SHZGCJCMOBCMKK-FPRJBGLDSA-N | 0.0012 | 0.66             |
| Glucoheptonic acid                               | FATUQANACHZLRT-KMRXSBRUSA-L | 0.0176 | 1.16             |
| Glucose                                          | WQZGKKKJIJFFOK-DVKNGEFBSAN  | 0.0001 | 1.22             |
| <b>Cholestane steroids</b>                       |                             |        |                  |
| Cholesterol                                      | HVYWMOMLDIMFJA-DPAQBDIFSA-N | 0.0024 | 0.61             |
| Cholesterol sulfate                              | BHYOQNUELFTYRT-DPAQBDIFSA-N | 0.0116 | 0.25             |
| <b>Diacylglycerols</b>                           |                             |        |                  |
| DG (33:3)                                        | QRWYRQDTDGUNRG-ABCZUFMESA-N | 0.0204 | 1.47             |
| <b>Fatty alcohols</b>                            |                             |        |                  |
| Momordol                                         | HDAGCVMZABLHLE-UHFFFAOYSA-N | 0.0355 | 1.96             |
| <b>Flavonoid glycosides</b>                      |                             |        |                  |
| Caohuoside D                                     | IINPFAXRBBMPBJ-BCNKTGMKSA-N | 0.0029 | 2.39             |
| <b>Glycerophosphates</b>                         |                             |        |                  |
| PA (44:5)                                        | CAEQPKFDJRNAGN-BMJUURGTSA-N | 0.0006 | 5.55             |
| <b>Glycerophosphocholines</b>                    |                             |        |                  |
| PC (22:6)                                        | LSOWKZULVQWMLY-APPDJCNMSAN  | 0.0031 | 4.34             |
| PC (34:1)                                        | WTJKGGKOPKCXLL-VYOBOKEXSAN  | 0.0000 | 0.03             |
| PC (34:2)                                        | JLPULHDHAOZNQI-ZTIMHPMXSAN  | 0.0161 | 0.69             |
| PC (o-36:4)                                      | DUUSFCFZBREELS-SEHARXJXSAN  | 0.0218 | 0.41             |
| PC (o-38:5)                                      | VJNPDLZENXBRLB-MQEDXBOASAN  | 0.0198 | 2.10             |
| PC (P-38:2)                                      | CRLRRUDVEGPSAN-WRPVVQBASAN  | 0.0080 | 2.54             |
| <b>Glycerophosphoethanolamines</b>               |                             |        |                  |
| PE (36:2)                                        | CFANDHZPOSNKNO-UDHSZFGOSAN  | 0.0000 | 5.40             |
| PE (36:4)                                        | SSCDRSKJTAQNNB-DWEQTYCFSAN  | 0.0237 | 0.31             |
| PE (38:4)                                        | ZSWHHKKYMMYPPD-MSZSINMWSAN  | 0.0168 | 0.67             |
| PE (38:6)                                        | MPWUZHZZKSTPV-MADBQMNMSAN   | 0.0176 | 0.24             |
| PE (40:6)                                        | XYYHNDVKALDFHQ-OXHZBIAZSAN  | 0.0355 | 0.37             |
| PE (o-38:5)                                      | DHHREGPDDQTYPB-UNRRGBOYSAN  | 0.0056 | 0.22             |
| PE (p-36:2)                                      | BIYXBOGKCFGRKR-NZWMGPRYSAN  | 0.0155 | 0.28             |
| PE (p-36:4)                                      | KDMBUUZGCXQNBEXBICFDGKSAN   | 0.0070 | 0.21             |
| PE (p-38:5)                                      | VWNWYWMBTKYEEL-SXDACRMGSAN  | 0.0038 | 0.22             |

| Class/Pathway and Metabolites                          | InChI Key                    | p(FDR) | Ratio (T2D-M/ND) |
|--------------------------------------------------------|------------------------------|--------|------------------|
| <b>Glycerophosphoethanolamines (continued)</b>         |                              |        |                  |
| PE (p-38:6)                                            | WVGALBKSWOUIEZ-XNHMFJFDSA-N  | 0.0116 | 0.31             |
| PE (p-40:6)                                            | FIJFPUAJUDAZEY-MNDXXDKYSA-N  | 0.0194 | 0.25             |
| <b>Glycerophosphoinositols</b>                         |                              |        |                  |
| PI (36:4)                                              | KIQYUSYSJTUGFZ-YLSTVYOTSA-N  | 0.0108 | 0.22             |
| <b>Glycerophosphoserines</b>                           |                              |        |                  |
| PS (22:1)                                              | UVRWNZBXLMSZFS-IEACRGRWSA-N  | 0.0397 | 0.77             |
| PS (36:1)                                              | AJFWREUFUPEYII-PAHWMLEVSA-N  | 0.0229 | 0.35             |
| PS (38:4)                                              | SVOUGFFDROZBJI-DNALCEECSA-N  | 0.0208 | 0.35             |
| PS (o-35:0)                                            | CRNHCTGXEIEELY-RGULYWFUSA-N  | 0.0176 | 3.64             |
| <b>Lineolic acids and derivatives</b>                  |                              |        |                  |
| Dimorphecolic acid (9-HODE)                            | NPDSHTNEKLQQIJ-SIGMCMEVSA-N  | 0.0128 | 0.73             |
| <b>Medium-chain hydroxy acids and derivatives</b>      |                              |        |                  |
| 3-Hydroxydodecanoic acid                               | MUCMKTPAZLSKTL-UHFFFAOYSA-N  | 0.0128 | 0.66             |
| <b>Phosphosphingolipids</b>                            |                              |        |                  |
| SM (d36:1)                                             | LKQLRGMMAHREN-YJFXUYILSA-N   | 0.0000 | 0.15             |
| SM (d38:0)                                             | UGRZESKDAPEULH-ACEXITHZSA-N  | 0.0388 | 1.91             |
| SM (d42:2)                                             | WKZHECFHXLTLJ-QYKFWSDSSA-N   | 0.0211 | 0.56             |
| <b>Purine ribonucleotides</b>                          |                              |        |                  |
| Adenosine triphosphate                                 | ZKHQWZAMYRWXGA-KQYNXXCUSA-J  | 0.0321 | 2.30             |
| Inosine diphosphate                                    | JPXZQMKKFWMMGK-KQYNXXCUSA-N  | 0.0000 | 1.94             |
| <b>Steroid esters</b>                                  |                              |        |                  |
| CE(20:4)                                               | IMXSFYNMSOULQS-BEDFLICRSA-N  | 0.0024 | 0.23             |
| Cholesteryl linoleate                                  | NAACPBBQTFYQB-LJAITQKLSA-N   | 0.0017 | 0.25             |
| <b>Sulfones</b>                                        |                              |        |                  |
| 2-Propenyl 3-(2-propenylsulfonyl)-1-propenyl disulfide | OBJCYMGLWKMJK-ALCCZGGFSA-N   | 0.0253 | 1.97             |
| <b>Tricarboxylic acids and derivatives</b>             |                              |        |                  |
| Citric acid                                            | KRKNYBCHXYNGOX-UHFFFAOYSA-N  | 0.0447 | 1.37             |
| <b>Triacylglycerols</b>                                |                              |        |                  |
| TG (39:0)                                              | WQFIBIGMXQGDCU-LDLOPFEMSA-N  | 0.0022 | 0.50             |
| TG (52:2)                                              | BHPBNQOWGMVFMA-QGJNQHKMSA-N  | 0.0487 | 0.24             |
| TG (52:3)                                              | JOSCSCZRVLHRLGE-CQBMRIABSA-N | 0.0046 | 0.27             |
| <b>Triterpenoids</b>                                   |                              |        |                  |
| Fasciculol C                                           | YRXIDKUVBPMNRA-YTOKZNHUSA-N  | 0.0056 | 2.09             |
| <b>Vitamin D and derivatives</b>                       |                              |        |                  |
| (20R)-24-Hydroxygemininivitamin D3                     | UAKRHUPVCAWPPT-DBQRCUIGSA-N  | 0.0116 | 1.36             |
